# Supplementary material
Source: HighWire-hosted journal article supplement (https://bmjopen.bmj.com/content/11/2/e042435)
Supplement: inline-supplementary-material-2 [file inline-supplementary-material-2.pdf]

## Appendix B

### The questionnaire for prognostic factors and prediction models in acute aortic dissection

#### 1. Study basic information

|                                                                |                                                                                                                    |
|----------------------------------------------------------------|--------------------------------------------------------------------------------------------------------------------|
| 1.1 First author                                               |                                                                                                                    |
| 1.2 Year of Publication                                        |                                                                                                                    |
| 1.3 Region                                                     |                                                                                                                    |
| 1.4 Period of Data Collection                                  |                                                                                                                    |
| 1.5 Dissection type                                            | 1) A<br>2) B<br>3) A/B                                                                                             |
| 1.6 Outcome (such as in-hospital mortality、one-year mortality) |                                                                                                                    |
| 1.7 age(SD)(years)                                             |                                                                                                                    |
| 1.8 male(%)                                                    |                                                                                                                    |
| 1.9 Study purpose                                              | 1) Prediction performance of prognostic factors<br>2) Develop a model without validation<br>3) External validation |

#### 2. performance information of prognostic factors or prediction models

|                                 |  |
|---------------------------------|--|
| <b>2.1 Prognostic factors</b>   |  |
| 2.1.1 predictors 1              |  |
| The name of the predictors      |  |
| Cut-off value(or score)         |  |
| AUC(95% CI)                     |  |
| P value of Hosmer-Lemeshow test |  |
| sensitivity                     |  |
| specificity                     |  |
| 2.1.2 predictors 2              |  |
| The name of the predictors      |  |
| Cut-off value(or score)         |  |
| AUC(95% CI)                     |  |
| P value of Hosmer-Lemeshow test |  |
| sensitivity                     |  |
| specificity                     |  |
| 2.1.3 predictors 3              |  |
| The name of the predictors      |  |
| Cut-off value(or score)         |  |
| AUC(95% CI)                     |  |
| P value of Hosmer-Lemeshow test |  |
| sensitivity                     |  |

|                                                                                           |                                                                                                                                                                   |
|-------------------------------------------------------------------------------------------|-------------------------------------------------------------------------------------------------------------------------------------------------------------------|
| specificity                                                                               |                                                                                                                                                                   |
| .....                                                                                     |                                                                                                                                                                   |
| <b>2.2 Prediction models</b>                                                              |                                                                                                                                                                   |
| 2.2.1 Number of predictors in model, please specify the name of the predictors.           |                                                                                                                                                                   |
| 2.2.2 the type of model<br>Check all that apply                                           | 1) derivation model<br>2) internal validation<br>3) external validation                                                                                           |
| 2.2.2.1 Sampling method used for internal validation<br>Check all that apply              | 1) Bootstrapping<br>2) Cross validation<br>3) Split-sample<br>4) Jackknifing procedure<br>5) Leave-one-out method<br>6) Monte Carlo simulations<br>Other, specify |
| 2.2.2.2 External validation<br>Check all that apply                                       | 1) Temporal validation<br>2) Geographical validation<br>3) Other, specify                                                                                         |
| 2.2.3 What was the method used for assess the overall performance<br>Check all that apply | 1) $R^2$<br>2) Nagelkerke's $R^2$<br>3) Brier Score<br>4) Other, specify                                                                                          |
| 2.2.3.1 The reported value of the overall performance                                     |                                                                                                                                                                   |
| 2.2.4 What was the method used for assessing discrimination<br>Check all that apply       | 1) C statistic (ROC curve)<br>2) Harrell's overall c statistic<br>3) Discrimination Slope(Box plots)<br>4) Lorenz curve<br>5) Log-rank<br>6) Other, specify       |
| 2.2.4.1 The reported value of discrimination                                              |                                                                                                                                                                   |
| 2.2.5 What was the method used for assessing calibration<br>Check all that apply          | 1) P value of Hosmer-Lemeshow test<br>2) Calibration plot<br>3) Calibration slope<br>4) Other, specify                                                            |
| 2.2.5.1 The reported value or judge of calibration                                        |                                                                                                                                                                   |
| 2.2.6 Reclassification NRI, % (95% CI/P Value)(NRI, Net reclassification Index)           |                                                                                                                                                                   |
| 2.2.7 Reclassification IDI, % (95% CI/P Value)( IDI, Integrative Discriminative Index)    |                                                                                                                                                                   |

### 3. The questionnaire about the methodological characteristics consists of five domains

**Domain 1: Study design**

|                                                                                                      |  |
|------------------------------------------------------------------------------------------------------|--|
| 1.1 No. of Centers                                                                                   |  |
| 1.2 No. of patients                                                                                  |  |
| 1.3 No. of Events                                                                                    |  |
| 1.4 Source of data (e.g., cohort, case-control, randomized trial participants, EMR or registry data) |  |
| 1.5 Study design (Retrospective cohort, Prospective cohort, Nested case-control, Case-control study) |  |

**Domain 2: Participants**

|                                                                                              |                                                      |
|----------------------------------------------------------------------------------------------|------------------------------------------------------|
| 2.1 Were appropriate data sources used, e.g., cohort, RCT, or nested case-control study data | 1) Yes, specify<br>2) No, specify<br>3) Not reported |
| 2.2 Whether did the study clearly describe inclusion criteria                                | 1) yes<br>2) no<br>3) Not reported                   |
| 2.3 Whether did the study clearly describe exclusion criteria                                | 1) yes<br>2) no<br>3) Not reported                   |

**Domain 3: Predictors**

|                                                                                      |                                    |
|--------------------------------------------------------------------------------------|------------------------------------|
| 3.1 Consistent definition/diagnostic criteria of predictors used in all participants | 1) Yes<br>2) No<br>3) Not reported |
| 3.2 Consistent measurement of predictors used in all participants                    | 1) Yes<br>2) No<br>3) Not reported |

**Domain 4: Outcome**

|                                                                                    |                                    |
|------------------------------------------------------------------------------------|------------------------------------|
| 4.1 Consistent definition/diagnostic criteria of outcomes used in all participants | 1) Yes<br>2) No<br>3) Not reported |
| 4.2 Consistent measurement of outcomes used in all participants                    | 1) Yes<br>2) No<br>3) Not reported |

**Domain 5: Analysis**

|                                                              |                 |
|--------------------------------------------------------------|-----------------|
| 5.1 Were all enrolled participants included in the analysis? | 1) yes<br>2) no |
|--------------------------------------------------------------|-----------------|

|                                                                                                                                       |                                                                                                                                                                                                                                                                                 |
|---------------------------------------------------------------------------------------------------------------------------------------|---------------------------------------------------------------------------------------------------------------------------------------------------------------------------------------------------------------------------------------------------------------------------------|
|                                                                                                                                       | 3) Not reported                                                                                                                                                                                                                                                                 |
| 5.2 Number of outcomes/events in relation to the number of predictors in multivariable analysis (Events Per Variable: EPVs)           | 1) $\geq 20$<br>2) 10-20<br>3) $< 10$                                                                                                                                                                                                                                           |
| 5.3 Statistical method for selecting predictors during addressing prognostic factors or prediction models<br>Check all that apply     | 1) Backward selection<br>2) Forward selection<br>3) Added a specific predictor for existing model<br>4) All predictors included regardless of statistical significance<br>5) Univariate analysis of predictors by p value<br>6) Other, specify:<br>7) Not reported              |
| 5.4 Handling the predictors for addressing prognostic factors or prediction models<br><br>Check all that apply                        | 1) Continuous predictor was transformed into categories<br>2) Non-linear transformation<br>3) Not reported<br>4) Other, specify                                                                                                                                                 |
| 5.5 Were missing outcome data reported, and the methods handling missing outcome                                                      | 1) Yes, specify<br>2) No<br>3) Not reported                                                                                                                                                                                                                                     |
| 5.6 Was any missing predictor data reported, and the methods handling missing predictor                                               | 1) Yes, specify<br>2) No<br>3) Not reported                                                                                                                                                                                                                                     |
| 5.7 Model structure used in the study                                                                                                 | 1) Linear regression<br>2) Logistic regression<br>3) Multinomial logistic<br>4) Cox regression<br>5) Decision tree<br>6) Bayesian (and logistic)<br>7) Machine learning<br>8) Artificial neural network<br>9) Partial least squares-discriminant analysis<br>10) Other, specify |
| 5.8 Were relevant model performance measures evaluated for addressing prognostic factors or prediction models<br>Check all that apply | 1) Both calibration and discrimination are evaluated<br>2) Only calibration is evaluated<br>3) Only discrimination is evaluated<br>4) Other, specify                                                                                                                            |
